# Supplementary material for: Costs to Medicare of the Informatics for Diabetes Education and Telemedicine (IDEATel) Home Telemedicine Demonstration
Source: Oxford University Press journal article supplement (doi:10.2337/dc09-0094), 2009-04-14
Supplement: dc09-0094_online_appendix.doc [file dc09-0094_online_appendix.doc]

**APPENDIX**

This appendix provides details on the demonstration’s design, as well as the methodology used to estimate the demonstration’s costs and impacts on Medicare expenditures. Specifically, the first section describes the details of the IDEATel demonstration design. The next three sections focus on: the methodology used to estimate the demonstration’s costs during each Phase, the methods used to calculate Medicare expenditures, and the approach for estimating impacts on Medicare costs. The final section describes the sensitivity analyses that were conducted for the impact analysis.

**DEMONSTRATION DESIGN**

The design and implementation of IDEATel was conducted by a consortium led by Columbia University College of Physicians and Surgeons and Columbia-Presbyterian Medical Center (the Consortium). Details on the study design are provided elsewhere (1). The study is registered with the clinical trial registration number NCT00271739. The CONSORT statement is attached.

In brief, the study was conducted in two four-year phases from February 2000 through February 2008 in New York City and in upstate New York. From December 2000 and October 2002, the Consortium recruited the first cohort of sample members (know as Cohort 1). In order to detect clinically meaningful changes in two key clinical outcomes (hemoglobin A1c and blood pressure), the original planned sample size for Cohort 1 was 1,500; however, the planned sample size was increased due to early attrition in the treatment group. To further compensate for attrition of Cohort 1 and to test the use of a redesigned home telemedicine unit (HTU), the Consortium recruited a second cohort (known as Cohort 2) of 504 sample members starting in November 2004 and continued through October 2005. The baseline characteristics of sample members for each cohort, by treatment status, are shown in Appendix Tables A1 and A2.

The flow chart of patients through the eligibility and randomization process is shown in Appendix Figures A1 and A2. Sample members were enrolled through primary care practices in New York City and upstate New York. Eligibility was screened during a telephone interview prior to the in-person baseline exam. Those who were potentially eligible were invited to receive the baseline exam, where consent was obtained. After the baseline exam, the Research Division of the Hebrew Home for the Aged at Riverdale, the demonstration’s data coordination center, randomly assigned sample members to the treatment or control group in a 1:1 ratio. The sample members were randomized within clusters defined by primary care provider patient panels.

The staff that conducted the baseline exam and followup assessments were blinded to treatment status. However, due to the nature of the intervention, participants and physicians were not blinded to the participant’s treatment status.

There were no adverse associated with the study.

|  | New York City | |  | Upstate New York | |
| --- | --- | --- | --- | --- | --- |
| Characteristic | Treatment | Control |  | Treatment | Control |
| Age at Randomization (Years) |  |  |  |  |  |
| 55 to 64 | 10.1 | 11.4 |  | 13.9 | 12.6 |
| 65 to 69 | 35.8 | 38.5 |  | 30.4 | 30.0 |
| 70 to 74 | 29.0 | 23.6 |  | 25.3 | 26.4 |
| 75 to 79 | 17.9 | 18.6 |  | 17.7 | 17.4 |
| ≥80 | 7.3 | 8.0 |  | 12.8 | 13.5 |
| Male | 29.7 | 31.3 |  | 42.5 | 43.6 |
| Race/Ethnicity |  |  |  |  |  |
| African American, non-Hispanic/non-Latino | 24.2 | 23.7 |  | 6.9 | 6.3 |
| Hispanic | 74.1 | 74.1 |  | 1.8 | 0.9 |
| White, non-Hispanic/non-Latino | 0.5 | 1.6 |  | 89.9 | 91.2 |
| Other | 1.3 | 0.5 |  | 1.3 | 1.6 |
| Education (Years) |  |  |  |  |  |
| 11 | 78.1 | 73.2 |  | 35.8 | 37.7 |
| 12 | 16.2 | 18.1 |  | 38.7 | 37.0 |
| ≥13 | 5.6 | 8.5 |  | 25.5 | 25.3 |
| Lived Alone | 44.2 | 41.9 |  | 32.7 | 33.0 |
| Employed | 1.5 | 2.1 |  | 11.2 | 9.3 |
| Household Income (Dollars) |  |  |  |  |  |
| 10,000 | 84.4 | 82.0 |  | 19.5 | 16.7 |
| 10,001 to 20,000 | 9.6 | 9.5 |  | 31.1 | 32.5 |
| 20,001 to 30,000 | 1.0 | 1.1 |  | 20.6 | 18.5 |
| ≥30,001 | 0.3 | 0.8 |  | 15.0 | 16.3 |
| Missing | 4.8 | 6.6 |  | 13.9 | 16.0 |
| Reason for Medicare Entitlement |  |  |  |  |  |
| Old age | 76.3 | 73.5 |  | 72.7 | 73.4 |
| Disability | 23.7 | 26.5 |  | 27.3 | 26.6 |
| Duration of Medicare Enrollment |  |  |  |  |  |
| (Years) |  |  |  |  |  |
| <10 | 68.5 | 69.2 |  | 63.8 | 63.4 |
| 10 to 14 | 19.9 | 19.9 |  | 18.3 | 19.2 |
| ≥15 | 11.4 | 10.6 |  | 17.9 | 17.4 |
| Dually Eligible | 67.7 | 70.8 |  | 13.9 | 15.1 |
| Medicare Expenditures in the Year |  |  |  |  |  |
| Before Randomization (Mean Dollars) | 7,071 | 7,046 |  | 5,361 | 5,062 |
| Duration of Diabetes (Years) |  |  |  |  |  |
| <5 | 29.4 | 27.8 |  | 32.9 | 31.7 |
| 5 to 9 | 19.7 | 19.5 |  | 18.7 | 23.5 |
| 10 to 14 | 18.0 | 17.6 |  | 18.7 | 14.6 |
| ≥15 | 32.9 | 35.0 |  | 29.7 | 30.1 |
| Ever Used a Personal Computer | 4.6 | 6.4 |  | 32.1 | 34.2 |
|  |  |  |  |  |  |
| Systolic Blood Pressure (Mean mmHg) | 143.3 | 141.9 |  | 142.4 | 142.9 |
| Systolic Blood Pressure >130 mmHg |  |  |  |  |  |
| (percentage) | 64.6 | 67.7 |  | 69.1 | 70.2 |
|  |  |  |  |  |  |
| Diastolic Blood Pressure (Mean |  |  |  |  |  |
| mmHg) | 72.6 | 71.0 |  | 70.7 | 71.0 |
| Diastolic Blood Pressure >80 mmHg |  |  |  |  |  |
| (percentage) | 22.5 | 17.9 |  | 19.0 | 18.6 |
|  |  |  |  |  |  |
| Body Mass Index (mean kg/m2) | 30.4 | 30.1 |  | 33.5 | 33.1 |
| Overweight (percentage) | 83.8 | 79.3 |  | 93.0 | 90.6 |
| Obese (percentage) | 45.2 | 45.5 |  | 66.4 | 65.2 |
| Total Cholesterol (Mean mg/dl) | 180.4 | 183.6 |  | 185.5 | 186.4 |
| Mean LDL Cholesterol |  |  |  |  |  |
| (Mean mg/dl) | 104.4 | 107.3 |  | 109.0 | 108.9 |
| LDL Cholesterol 100 (percentage) | 51.7 | 53.4 |  | 56.3 | 55.1 |
|  |  |  |  |  |  |
|  |  |  |  |  |  |
| Mean Hemoglobin A1c (%) | 7.7 | 7.8 |  | 7.1 | 7.0 |
| Hemoglobin A1c ≥7.0% (percentage) | 59.5 | 58.9 |  | 45.6 | 43.4 |
| Hemoglobin A1c ≥8.0% (percentage) | 36.7 | 36.3 |  | 17.1 | 15.0 |
|  |  |  |  |  |  |
| Mean Urine Albumin-to Creatinine Ratio | 206.0 | 255.8 |  | 164.3 | 165.9 |
| Insignificant Microalbuminuria |  |  |  |  |  |
| (percentage) | 50.6 | 51.0 |  | 53.0 | 50.6 |
| Microalbuminuria (percentage) | 35.2 | 32.7 |  | 34.5 | 39.4 |
| Clinical Proteinuria (percentage) | 14.2 | 16.3 |  | 12.5 | 10.0 |
| Sample Size | 397 | 377 |  | 447 | 443 |

Source: IDEATel telephone screen and in-person baseline interviews, conducted between November 2000 and October 2002 and Medicare claims and enrollment records. Excludes one enrollee whose dropout date preceded his randomization date.

LDL = low-density lipoprotein; mmHg = millimeters of mercury.

**Appendix Table A1**—Characteristics of Cohort 1 enrollees at baseline, by site (Percentages, unless noted)

|  | New York City | |  | Upstate New York | |
| --- | --- | --- | --- | --- | --- |
| Characteristic | Treatment | Control |  | Treatment | Control |
| Age at Randomization (Years) |  |  |  |  |  |
| 55 to 64 | 15.1 | 21.6 |  | 16.0 | 19.9 |
| 65 to 69 | 44.2 | 43.2 |  | 36.2 | 31.3 |
| 70 to 74 | 19.8 | 20.5 |  | 22.7 | 30.1 |
| 75 to 79 | 10.5 | 10.2 |  | 14.1 | 10.8 |
| ≥80 | 10.5 | 4.5 |  | 11.0 | 7.8 |
| Male | 29.1 | 29.5 |  | 51.5 | 54.8 |
| Race/Ethnicity |  |  |  |  |  |
| African American, non-Hispanic/non-Latino | 10.5 | 8.0 |  | 5.5 | 6.0 |
| Hispanic | 89.5 | 90.9 |  | 0.0 | 0.6 |
| White, non-Hispanic/non-Latino | 0.0 | 1.1 |  | 92.6 | 92.2 |
| Other | 0.0 | 0.0 |  | 1.8 | 1.2 |
| Education (Years) |  |  |  |  |  |
| 11 | 86.0 | 90.9 |  | 30.7 | 35.5 |
| 12 | 12.8 | 8.0 |  | 50.0 | 39.8 |
| ≥13 | 1.2 | 1.1 |  | 19.1 | 24.7 |
| Lived Alone | 23.3 | 37.5 |  | 29.4 | 30.7 |
| Employed | 1.2 | 0.0 |  | 12.9 | 13.3 |
| Household Income (Dollars) |  |  |  |  |  |
| 10,000 | 89.5 | 86.4 |  | 19.0 | 19.3 |
| 10,001 to 20,000 | 9.3 | 9.1 |  | 23.3 | 25.3 |
| 20,001 to 30,000 | 0.0 | 1.1 |  | 27.0 | 23.5 |
| ≥30,001 | 1.2 | 1.1 |  | 27.0 | 25.3 |
| Missing | 0.0 | 2.3 |  | 3.7 | 7.2 |
| Reason for Medicare Entitlement |  |  |  |  |  |
| Old age | 74.4 | 69.3 |  | 74.2 | 67.5 |
| Disability | 25.6 | 30.7 |  | 25.8 | 32.5 |
| Duration of Medicare Enrollment |  |  |  |  |  |
| (Years) |  |  |  |  |  |
| <10 | 74.4 | 79.5 |  | 65.6 | 70.5 |
| 10 to 14 | 12.8 | 14.8 |  | 19.6 | 18.1 |
| ≥15 | 12.8 | 5.7 |  | 14.7 | 11.4 |
| Dually Eligible | 75.6 | 71.6 |  | 14.1 | 16.3 |
| Medicare Expenditures in the Year |  |  |  |  |  |
| Before Randomization (Mean Dollars) | 6,965 | 7,615 |  | 5,019 | 6,468 |
| Duration of Diabetes (Years) |  |  |  |  |  |
| <5 | 37.2 | 36.4 |  | 35.0 | 30.9 |
| 5 to 9 | 14.0 | 21.6 |  | 20.2 | 21.2 |
| 10 to 14 | 15.1 | 22.7 |  | 15.3 | 20.6 |
| ≥15 | 33.7 | 19.3 |  | 29.4 | 27.3 |
| Ever Used a Personal Computer | 1.2 | 1.1 |  | 58.3 | 46.4 |
|  |  |  |  |  |  |
| Systolic Blood Pressure (Mean mmHg) | 143.0 | 135.5 |  | 140.6 | 139.2 |
| Systolic Blood Pressure >130 mmHg |  |  |  |  |  |
| (percentage) | 74.4 | 53.4 |  | 68.9 | 65.7 |
|  |  |  |  |  |  |
| Diastolic Blood Pressure |  |  |  |  |  |
| (Mean mmHg) | 73.3 | 70.5 |  | 72.2 | 70.5 |
| Diastolic Blood Pressure >80 mmHg (percentage) | 22.1 | 22.7 |  | 23.0 | 16.9 |
|  |  |  |  |  |  |
| Body Mass Index (mean kg/m2) | 31.9 | 31.8 |  | 35.1 | 35.2 |
| Overweight (percentage) | 93.0 | 92.0 |  | 94.3 | 93.3 |
| Obese (percentage) | 51.2 | 53.4 |  | 67.3 | 71.5 |
| Total Cholesterol (Mean mg/dl) | 178.1 | 172.5 |  | 162.6 | 160.0 |
| Mean LDL Cholesterol |  |  |  |  |  |
| (Mean mg/dl) | 102.6 | 100.1 |  | 89.6 | 87.0 |
| LDL Cholesterol 100 (percentage) | 47.7 | 48.9 |  | 36.6 | 24.1 |
| Mean Hemoglobin A1c (%) | 7.7 | 7.5 |  | 7.1 | 7.2 |
| Hemoglobin A1c ≥7.0% | 60.5 | 54.5 |  | 49.4 | 47.0 |
| Hemoglobin A1c ≥8.0% (percentage) | 37.2 | 25.0 |  | 17.3 | 22.3 |
| Mean Urine Albumin-to Creatinine |  |  |  |  |  |
| Ratio | 263.0 | 230.5 |  | 213.6 | 146.0 |
| Insignificant Microalbuminuria |  |  |  |  |  |
| (percentage) | 57.6 | 53.1 |  | 65.1 | 53.4 |
| Microalbuminuria (percentage) | 27.3 | 34.4 |  | 26.4 | 37.1 |
| Clinical Proteinuria (percentage) | 15.2 | 12.5 |  | 8.5 | 9.5 |
| Sample Size | 86 | 88 |  | 163 | 166 |

Source: IDEATel telephone screen and in-person baseline interviews, conducted between November 2004 and October 2005, and Medicare claims and enrollment records. Excludes one sample member that was missing baseline data.

LDL = low-density lipoprotein; mmHg = millimeters of mercury

**Appendix Table A2**—Characteristics of Cohort 2 enrollees at baseline, by site (Percentages, unless noted)

# **CONSORT Statement 2001 - Checklist**

Items to include when reporting a randomized trial

| PAPER SECTION And topic | Item | Descriptor | Reported on  Page # |
| --- | --- | --- | --- |
| TITLE & ABSTRACT | 1 | [How participants were allocated to interventions](http://www.consort-statement.org/index.aspx?o=1107) (e.g., "random allocation", "randomized", or "randomly assigned"). | p.3 and Appendix |
| INTRODUCTION Background | 2 | [Scientific background and explanation of rationale](http://www.consort-statement.org/index.aspx?o=1016). | p. 3-4 |
| METHODS Participants | 3 | [Eligibility criteria for participants](http://www.consort-statement.org/index.aspx?o=1017" \l "3a) and the [settings and locations where the data were collected](http://www.consort-statement.org/index.aspx?o=1017" \l "3b). | p. 3 |
| Interventions | 4 | [Precise details of the interventions intended for each group and how and when they were actually administered](http://www.consort-statement.org/index.aspx?o=1021). | p. 4 |
| Objectives | 5 | [Specific objectives and hypotheses](http://www.consort-statement.org/index.aspx?o=1022). | p. 3-4 |
| Outcomes | 6 | [Clearly defined primary and secondary outcome measures](http://www.consort-statement.org/index.aspx?o=1023" \l "6a) and, when applicable, any [methods used to enhance the quality of measurements](http://www.consort-statement.org/index.aspx?o=1023" \l "6b) (e.g., multiple observations, training of assessors). | p. 4 |
| Sample size | 7 | [How sample size was determined](http://www.consort-statement.org/index.aspx?o=1024" \l "7a) and, when applicable, [explanation of any interim analyses and stopping rules](http://www.consort-statement.org/index.aspx?o=1024" \l "7b). | Appendix |
| Randomization -- Sequence generation | 8 | [Method used to generate the random allocation sequence, including details of any restrictions](http://www.consort-statement.org/index.aspx?o=1025) (e.g., blocking, stratification) | Appendix |
| Randomization -- Allocation concealment | 9 | [Method used to implement the random allocation sequence](http://www.consort-statement.org/index.aspx?o=1026) (e.g., numbered containers or central telephone), clarifying whether the sequence was concealed until interventions were assigned. | Appendix |
| Randomization -- Implementation | 10 | [Who generated the allocation sequence, who enrolled participants, and who assigned participants to their groups](http://www.consort-statement.org/index.aspx?o=1027). | p. 3 and Appendix |
| Blinding (masking) | 11 | [Whether or not participants, those administering the interventions, and those assessing the outcomes were blinded to group assignment](http://www.consort-statement.org/index.aspx?o=1028" \l "11a). If done, [how the success of blinding was evaluated](http://www.consort-statement.org/index.aspx?o=1028" \l "11b). | Appendix |
| Statistical methods | 12 | [Statistical methods used to compare groups for primary outcome(s)](http://www.consort-statement.org/index.aspx?o=1029" \l "12a); [Methods for additional analyses](http://www.consort-statement.org/index.aspx?o=1029" \l "12b), such as subgroup analyses and adjusted analyses. | p. 5 |
| RESULTS Participant flow | 13 | [Flow of participants through each stage](http://www.consort-statement.org/index.aspx?o=1018) (a diagram is strongly recommended). Specifically, for each group report the numbers of participants randomly assigned, receiving intended treatment, completing the study protocol, and analyzed for the primary outcome. [Describe protocol deviations from study as planned, together with reasons](http://www.consort-statement.org/index.aspx?o=1086). | Appendix |
| Recruitment | 14 | [Dates defining the periods of recruitment and follow-up](http://www.consort-statement.org/index.aspx?o=1087). | p. 3 |
| Baseline data | 15 | [Baseline demographic and clinical characteristics of each group](http://www.consort-statement.org/index.aspx?o=1088). | Appendix Tables A1 and A2 |
| Numbers analyzed | 16 | [Number of participants (denominator) in each group included in each analysis and whether the analysis was by "intention-to-treat"](http://www.consort-statement.org/index.aspx?o=1089). State the results in absolute numbers when feasible (e.g., 10/20, not 50%). | p. 5 |
| Outcomes and estimation | 17 | [For each primary and secondary outcome, a summary of results for each group, and the estimated effect size and its precision](http://www.consort-statement.org/index.aspx?o=1090) (e.g., 95% confidence interval). | Table A1 |
| Ancillary analyses | 18 | [Address multiplicity by reporting any other analyses performed](http://www.consort-statement.org/index.aspx?o=1091), including subgroup analyses and adjusted analyses, indicating those pre-specified and those exploratory. | Appendix |
| Adverse events | 19 | [All important adverse events or side effects in each intervention group](http://www.consort-statement.org/index.aspx?o=1092). | Appendix |
| DISCUSSION Interpretation | 20 | [Interpretation of the results](http://www.consort-statement.org/index.aspx?o=1019), taking into account study hypotheses, sources of potential bias or imprecision and the dangers associated with multiplicity of analyses and outcomes. | p. 6 |
| Generalizability | 21 | [Generalizability (external validity) of the trial findings](http://www.consort-statement.org/index.aspx?o=1094). | p. 6 |
| Overall evidence | 22 | [General interpretation of the results in the context of current evidence](http://www.consort-statement.org/index.aspx?o=1095). | p. 6 |

ASSESSED FOR ELIGIBILITY

N=9,597

**Appendix Figure A1**—Analytic flow diagram, Cohort 1

STAGE 1: N=9,597

CMS excluded N=929

(155 Not in CMS system)

(566 expired)

(175 with incorrect Medicare number)

(8 with incorrect name and birthdate)

(25 other)

STAGE 2: N=2,201

Complete telephone screens received: N=2,201

Excluded at Telephone Screen: N=235

(8 due to vision)

(30 due to comorbid conditions)

(17 due to cognitive impairment)

(5 due to functional impairment)

(2 due to perceptual impairment)

(67 due to treatment by diet alone)

(19 due to residency)

(43 due to multiple criteria)

(44 due to other criteria)

STAGE 2A: N =1,966

Passed stage 2 but were not randomized: N=30

(204 refused/changed their minds)

(3 family refused)

(7 physician refused)_

(15 were too sick)

(15 unreachable)

(39 found not eligible (various reasons))

(10 recruitment complete prior to contact)

(4 expired)

(4 not specified)

Allocated to intervention: N=844

Received allocated intervention: N=791

Did not receive allocated intervention: N = 53

(15 refused)

(1 expired)

(2 family refused)

(1 physician refused)

(4 were too sick_

(22 refused due to the computer)

(8 relocated/change in living arrangement, etc)

Allocated to usual care: N=821

Analyzed N=800

(20 incomplete Medicare claims data due to continuous HMO enrollment)

(1 missing Medicare claims data)

RANDOMIZED N=1,665

Analyzed N=825

(18 incomplete Medicare claims data due to continuous HMO enrollment)

(1 excluded because dropout date preceded randomization date)

STAGE 1A:N=8,668

Other exclusion: N=6467

(2027 refused)

(215 family refused)

(59 language barrier)

(1 not alert)

(111 hearing impairment)

(211 physician impairment)

(199 cognitive impairment)

(246 too sick)

(176 physician refusal)

(1364 unreachable/no contact made)

(1674 not eligible (e.g., 846 non MUA/HPSA, 300 not diabetic)

(34 expired)

(150 not specified)

**Appendix Figure A2—**Analytic flow diagram, Cohort 2

STAGE 2: N=777

Complete telephone screens received: N=777

Excluded at Telephone Screen: N=136

(1 due to vision)

(17 due to comorbid conditions)

(3 due to cognitive e impairment

(4 due to functional impairment)

(0 due to perceptual impairment)

(64 due to treatment by diet alone)

(5 due to residency)

(20 due to multiple criteria)

(22 due to other criteria)

ASSESSED FOR ELIGIBILITY

N=3,750

STAGE 2A: N =641

Passed stage 2 but were not randomized: N=137

(98 refused/changed their minds)

(3 family refused)

(11 physician refused)

(5 were too sick)

(2 unreachable)

(4 found not eligible (various reasons))

(4 recruitment complete prior to contact)

(10 not specified)

Allocated to usual care: N=255

RANDOMIZED N=504

STAGE 1: N=3,750

CMS excluded: N=371

(139 not in CMS system)

(197 expired)

(14 with incorrect Medicare number)

(13 with incorrect name and birthdate)

(8 too young)

Allocated to intervention: N=249

Received allocated intervention: N=234

Did not receive allocated intervention: N = 15

(12 refused)

(1 refused due to the computer)

(2 relocated/change in living arrangement, etc)

ANALYZED: 243

(6 had incomplete Medicare claims data due to continuous HMO enrollment)

STAGE 1A:N=3,379

Other exclusion: N=2602

(708 refused)

(68 family refused)

(19 language barrier)

(1 not alert)

(15 hearing impairment)

(37 physician impairment)

(84 cognitive impairment)

(76 too sick)

(76 physician refusal)

(975 unreachable/no contact made)

(504 not eligible (e.g., 119 non MUA/HPSA, 196 not diabetic)

(32 expired)

(7 not specified)

ANALYZED: 248

(6 had incomplete Medicare claims data due to continuous HMO enrollment)

(1 missing baseline data)

**CALCULATION OF THE DEMONSTRATION’S COSTS**

The budget for the demonstration’s first and second phases was $28,159,066 and $28,812,419, respectively.

Demonstration costs were based on information obtained from seven sources: the budget data provided by the Consortium in 2004 and 2007; the Consortium’s technical proposals for Phase I and Phase II and progress reports to CMS; a paper published by the demonstration team (2); information collected during site visits and telephone calls; the website of the Office of Grants and Contracts for Columbia University’s Health Sciences Division (3); research on market prices of the goods and services used in the demonstration (4); and a consultant of telemedicine (4). The estimates were built from the bottom up, by identifying and then pricing out every aspect of the demonstration.

Cost estimates distinguished between costs related directly to the intervention, which would occur in an ongoing program, and costs related to demonstration research, which would not (Appendix Table A3). Each component of the intervention was categorized as a design, implementation, or closeout activity. *Design* costs are defined as one-time costs associated with setting up the intervention, such as designing and redesigning the HTU software, purchase of new nurse case manager workstations, and recruitment of physicians and patients to participate. *Implementation costs* are defined as ongoing costs, primarily for the leasing of case management software, conducting the case management and televisits, purchasing the HTUs, installation of devices in participants’ homes, and training of participants in how to use the HTUs. *Closeout* costs are those associated with removal of HTUs from participants’ homes (which happened only during Phase II for both Cohort 1 and Cohort 2 participants).

The total cost of the demonstration in the base year was calculated by summing the costs of each of these components. Because the estimated sum exceeded the actual amount of the cooperative agreement between Columbia University and the Centers for Medicare & Medicaid Services, the agreement amount was apportioned according to the proportional percentages of the estimated component costs (Appendix Table A4). Finally, design and close-out costs for the intervention costs were depreciated over a four-year period for Phase I and over a three-year period for Phase II.

Costs per participant for each phase were calculated by dividing the intervention-related costs by the number of participants in the demonstration in each phase. There were 844 Phase 1 participants (the entire Cohort 1 treatment group). The number of Phase II participants included the 514 Cohort 1 treatment group members who were still participating in the demonstration at the beginning of Phase II as well as all 249 Cohort 2 treatment group members. The average length of participation was two years during Phase I and 2.67 years during Phase II (three years for the Cohort 1 participants that were still participating in Phase II, and two years for Cohort 2 participants because the randomization of Cohort 2 did not begin until the end of the first year of Phase II). Finally, for Cohort 1, the average annual cost per participant over the two phases of the project was calculated by averaging the annual costs per participant during Phase I and the annual costs per participant during Phase II; this average was weighted by the average length of time that Cohort 1 participants were enrolled during each phase.

|  | Cost Allocation | |
| --- | --- | --- |
| Demonstration Component | Intervention-Related | Research-Related |
| Design Stage |  |  |
| Development of systems architecture* | 100 | 0 |
| Purchase of case managers’ workstations | 100 | 0 |
| Development of software for HTUs | 100 | 0 |
| Recruitment of physicians and enrollees | 10 | 90 |
| Implementation Stage |  |  |
| Purchase of HTUs | 100 | 0 |
| Installation of HTUs and training of participants | 100 | 0 |
| Lease of case management software | 100 | 0 |
| Information systems support | 100 | 0 |
| Case management and televisits | 100 | 0 |
| Screening and assessment of enrollees | 10 | 90 |
| Internal evaluation/quality improvement† | 10 | 90 |
| Project management and other direct costs | 50 | 50 |
| Closeout Stage (HTU De-installation) | 10 | 90 |

Sources: Cost components were constructed during Phase I based on proposals and progress reports provided by the Consortium; a paper published by the demonstration team (2); information collected during site visits and telephone calls; and the input of a consultant in telemedicine (4).

* This category is relevant only for Phase I.

† Assumed that 10 percent of activities related to the internal evaluation (such as collecting data) would occur in an ongoing program for the purposes of quality control and reporting.

HTU = home telemedicine unit.

**Appendix Table A3**— Allocation of demonstration components as intervention related or research related for Phase I and Phase II costs (Percentages)

| Demonstration Component | Estimated Percentage of Total Demonstration Costs* | Total Demonstration Costs for Phase I | Total Demonstration Costs for Phase II |
| --- | --- | --- | --- |
| Research-Related Costs | 39 | $10,935,713 | $11,250,257 |
| Intervention-Related Costs | 61 | $17,223,353 | $17,562,162 |
| Design Stage |  |  |  |
| Development of systems architecture† | 7 | $1,989,252 | n.a. |
| Purchase of case managers’ workstations | <1 | $38,750 | $14,659 |
| Development of software for HTUs | 7 | $2,076,033 | $3,094,490 |
| Recruitment of physicians and enrollees | <1 | $203,491 | $85,166 |
| Implementation Stage |  |  |  |
| Purchase of HTUs | 13 | $3,598,340 | $2,865,349 |
| Installation of HTUs and training of |  |  |  |
| Participants | 5 | $1,512,555 | $3,530,129 |
| Lease of case management software | 1 | $285,749 | $318,226 |
| Information systems support | 9 | $2,421,982 | $2,228,956 |
| Case management and televisits | 11 | $3,044,144 | $3,395,355 |
| Screening and assessment of enrollees | <1 | $164,611 | $57,425 |
| Quality improvement | <1 | $99,720 | $116,794 |
| Project management and other direct costs | 6 | $1,778,470 | $1,826,194 |
| Closeout Stage (HTU De-installation) | <1 | $10,256 | $29,418 |
| Total Demonstration Costs |  | $28,159,066 | $28,812,419 |

Sources: MPR’s estimates based on information obtained from the Consortium’s technical proposal and progress reports; a paper published by the demonstration team (2); information collected during site visits; the website of the Office of Grants and Contracts for Columbia University’s Health Sciences Division (3); the input from the Consortium on salaries of demonstration staff, the staff’s levels of effort, and the value of subcontracts; and MPR’s research on market prices (4).

* Estimated percentages based on Phase I budget. Estimated percentages for Phase II were similar to those of Phase I.

† This category is only relevant for Phase I.

HTU = home telemedicine unit; MPR = Mathematica Policy Research, Inc.; n.a. = not applicable.

**Appendix Table A4**—Allocation of estimated Phase I and Phase II demonstration costs to actual cooperative agreement amount for each phase.

**CALCULATION OF MEDICARE EXPENDITURES**

Medicare Part A and Part B expenditures for each enrollee were calculated from claims data for the period 1999-2006 by adding expenditures for all episodes of care between randomization and the end of the study follow-up period (December 31, 2006). Expenditures per enrollee for the baseline year (the year before randomization) were also calculated so that baseline expenditures (which are strong predictors of expenditures during the followup period) could be included as regression control variables.

This *intent-to-treat analysis* includes 1,625 Cohort 1 sample members and 491 Cohort 2 sample members, excluding only the 40 Cohort 1 sample members and the 13 Cohort 2 sample members who were continuously enrolled in a health maintenance organization (HMO). Also, if a sample member was in an HMO for part of the followup period and in fee-for-service for part of the followup period, expenditures are excluded during the months that the individual was in an HMO. Because Medicare claims data are not available for those in managed care, IDEATel would not be expected to have an effect on the capitation payment that Medicare pays the HMOs for providing health services to demonstration enrollees in managed care (that is, the intervention cannot affect the Medicare expenditures for demonstration enrollees in an HMO). Thus, excluding those in an HMO ensures that only the expenditures that IDEATel could affect are included in the analysis. Finally, three Cohort 1 sample members in New York City who were missing data for one or more regression control variables are excluded from particular analyses.

Annualized expenditures for each enrollee were calculated by multiplying the sum of expenditures for the study period by 12/*m,* where *m* denotes the number of months of enrollment in Medicare (but not in an HMO) from randomization through the end of the event that defined the study period for each sample (for instance, December 31, 2006) or death (if the beneficiary died before the end of the event that defined the study period). The percentage of sample members that died during the follow-up period (between randomization and December 31, 2006) was about 16 percent for Cohort 1 in New York City, 22 percent for Cohort 1 in upstate New York, 4 percent for Cohort 2 in New York City, and 3 percent for Cohort 2 in upstate New York. The mortality rates were similar for the treatment and control groups within each site and cohort, so excluding expenditures after death should not bias our estimates.

**methods for estimating impacts on medicare expenditures**

A weighted linear regression model was fitted for each measure of Medicare expenditures, controlling for enrollees’ characteristics at the time of randomization, using STATA (5). The demographic characteristics included are age, race/ethnicity, sex, education, living arrangements, employment status, household income, previous knowledge of computers, length of Medicare enrollment, whether dually eligible for Medicare and Medicaid, whether enrolled in an HMO in the month before randomization, and Medicare expenditures during the year before randomization. The health characteristics are reason for Medicare entitlement and years since diabetes was diagnosed. Finally, the model included a binary indicator for the treatment group.

This type of model was estimated separately for each site and cohort. Weights were equal to the length of the period between randomization and the end of the study follow-up period (December 31, 2006). The length of the followup period ranged from 50 to 72 months for Cohort 1 and from 14 to 24 months for Cohort 2, depending on when an individual was randomized. Predicted outcomes for treatment and control group enrollees were calculated by using coefficients from each of the estimated models.

**SENSITIVITY TESTS**

In addition to examining differences in the demonstration’s impacts on Medicare expenditures by site, several sensitivity tests were conducted to assess the robustness of the findings.

The first sensitivity test assessed the variation of the impact estimates for the intent-to-treat sample to large Medicare expenditures (that is, those exceeding the 98th percentile of the distribution of a specific outcome). People with serious health problems typically incur large expenditures near the end of their life. Rerunning the impact analysis with capped (or truncated) expenditures allowed us to assess whether the estimated impact of the intervention was due to the influence of a few beneficiaries with unusually high use of Medicare-covered services.

Overall, the impact estimates are insensitive to unusually large expenditures (Appendix Table A5). For Cohort 1, capping expenditures at their 98th percentile resulted in no change to the sign of the difference between treatment group and control group expenditures relative to the unadjusted (or uncapped) estimates. Likewise, there was no change in the statistical significance of the test of the difference in outcomes from zero between groups. For Cohort 2, impacts based on both capped and uncapped data were generally small and statistically insignificant in New York City. For Cohort 2 in upstate New York, the demonstration’s impacts on total Medicare expenditures were negative and not statistically significant at the .05 level, regardless of whether the model was based on capped or uncapped expenditures.

A second set of sensitivity tests included running models using logged dependent variables, as well as a Generalized Linear Model (GLM) model that uses a log link and a gamma error structure. While the significance levels and size of the impacts varied somewhat from model to model, the demonstration never significantly reduced Medicare costs. Thus, conclusions were not sensitive to the type of model. Finally, a series of specification tests suggested that heteroskedasticity, skewness, and kurtosis of residuals were not problematic in our weighted least squares analysis.

|  |  | No Adjustment to Expenditures | | | | | | | | |  |  | Expenditures Capped at the 98th Percentile | | | | | | |
| --- | --- | --- | --- | --- | --- | --- | --- | --- | --- | --- | --- | --- | --- | --- | --- | --- | --- | --- | --- |
|  |  | New York City | | | | |  | Upstate New York | | |  |  | New York City | | |  | Upstate New York | | |
|  |  | Treatment  Group | Control  Group | | | Difference  (*p*-Value) |  | Treatment  Group | Control  Group | Difference  (*p*-Value) |  |  | Treatment  Group | Control  Group | Difference  (*p*-Value) |  | Treatment  Group | Control  Group | Difference  (*p*-Value) |
| Cohort 1 | | | | | | | | | | | | | | | | | | | |
|  |  |  |  |  | | |  |  |  |  |  |  |  |  |  |  |  |  |  |
| Total Medicare |  | 13,845 | 12,961 | 885  (.476) | | |  | 9,566 | 8,450 | 1,116  (.094) |  |  | 13,582 | 12,689 | 893  (.434) |  | 9,386 | 8,328 | 1,057  (.075) |
| Medicare Part A |  | 8,446 | 7,502 | 945  (.344) | | |  | 5,136 | 4,539 | 597  (.247) |  |  | 8,146 | 7,320 | 826  (.359) |  | 4,988 | 4,419 | 570  (.199) |
| Medicare Part B |  | 5,399 | 5,459 | -60  (.870) | | |  | 4,430 | 3,911 | 519  (.025) |  |  | 5,254 | 5,400 | -145  (.656) |  | 4,352 | 3,844 | 508  (.012) |
| Sample Size |  | 379 | 358 |  | | |  | 446 | 442 |  |  |  | 379 | 358 |  |  | 446 | 442 |  |
| Cohort 2 | | | | | | | | | | | | | | | | | | | |
| Total Medicare |  | 11,906 | 11,661 | | 245  (.931) | |  | 6,450 | 8,694 | -2,244  (.132) |  |  | 11,344 | 11,599 | -255  (.922) |  | 6,098 | 8,131 | -2,033  (.081) |
| Medicare Part A |  | 7,296 | 6,886 | | 410  (.867) | |  | 2,991 | 4,957 | -1,966  (.118) |  |  | 6,779 | 6,829 | -51  (.982) |  | 2,712 | 4,396 | -1,684  (.070) |
| Medicare Part B |  | 4,610 | 4,775 | | -165  (.799) | |  | 3,458 | 3,736 | -278  (.443) |  |  | 4,519 | 4,724 | -205  (.731) |  | 3,414 | 3,715 | -300  (.388) |
| Sample Size |  | 82 | 84 | |  | |  | 161 | 164 |  |  |  | 82 | 84 |  |  | 161 | 164 |  |

Source: IDEATel tracking status file and Medicare claims and enrollment records.

Notes: Means were predicted with ordinary least squares regression models, which controlled for enrollees’ baseline characteristics and expenditures during the year prior to randomization. Estimates reflect annualized expenditures for the period from each sample member’s randomization through the end of the study follow-up period (December 31, 2006), and reflect only months during which the enrollee was alive and not in an HMO. Observations are weighted by the fraction of the follow-up period that the enrollee was alive and not in an HMO. The reported sample size includes the full sample of enrollees (excluding those who were continuously enrolled in an HMO). Three control group members are dropped from the analysis in New York City in Cohort 1 because they were missing control variables in the regression analysis. Because of rounding, the treatment-control difference may not exactly equal the treatment group mean minus the control group mean.

HMO = health maintenance organization.

**Appendix Table A5**—Estimated annual per-person expenditures for Medicare-covered services, for uncapped and capped expenditures by site and cohort

References

1. Shea S, Weinstock RS, Starren J, Teresi J, Palmas W, Field L, Morin P, Goland R, Izquierdo RE, Wolff LT, Ashraf M, Hilliman C, Silver S, Meyer S, Holmes D, Petkova E, Capps L, Lantigua RA: A Randomized Trial Comparing Telemedicine Case Management with Usual Care in Older, Ethnically Diverse Medically Underserved Patients with Diabetes Mellitus. J Am Med Informat Assoc 13: 40-51, 2006

2. Starren J, Shea S, Weinstock RS, Knudson PE, Morin PC, Teresi J, Holmes D, Palmas W, Field L, Goland R, Hripcsak G, Hilliman C, Ashraf M, Liss D: The IDEATel Project: Up and Running. Presentation at the American Telemedicine Association Seventh Annual Meeting and Exposition, ATA 2002: Healthcare Solutions Through Telemedicine, Los Angeles, CA, June 2-5, 2002, [www.atmeda.org/news/2002_presentations/starren.theideatel.ppt](http://www.atmeda.org/news/2002_presentations/starren.theideatel.ppt), (March 10, 2003)

3. Columbia University: Manual of Policies and Procedures, New York: Columbia University, Health Sciences Division, Office of Grants and Contracts, www.cpmcnet .columbia.edu/research/ogcm2598.htm, (May 1, 2003)

4. U.S. Department of Health and Human Services: Report to Congress: Second Interim Report on the Informatics for Diabetes Education and Telemedicine (IDEATel) Demonstration: Final Report on Phase I. Washington, DC: DHHS, December 18, 2005

5. StataCorp: *Stata Statistical Software: Release 9.0*. Reference R-Z. College Station, TX: Stata Corporation, 2005
